# Supplementary material
Source: HighWire-hosted journal article supplement (https://www.annfammed.org/highwire/filestream/26552/field_highwire_adjunct_files/0/MullenSuppApp.pdf)
Supplement: MullenSuppApp.pdf [file MullenSuppApp.pdf]

## Supplemental materials for

### Adult ADHD Diagnosis in a Family Medicine Clinic

*Ryan Heltemes, DO<sup>1</sup>*

*Dureeti Foge, MD<sup>1</sup>*

*Maren Wolf, MD<sup>1</sup>*

*Marina Kirkeide, MS<sup>2</sup>*

*Zach Merten, MD<sup>1</sup>*

*Gregory Dukinfield, MD<sup>1</sup>*

*Christine Morley, MD<sup>1</sup>*

*David Wilkins, DO<sup>1</sup>*

*Deborah M. Mullen, PhD<sup>3</sup>*

<sup>1</sup>University of Minnesota Methodist Family Medicine Residency, St Louis Park, Minnesota

<sup>2</sup>University of Minnesota Medical School, Minneapolis, Minnesota

<sup>3</sup>The University of Tennessee at Chattanooga, Chattanooga, Tennessee

<https://doi.org/10.1370/afm.3178>

**Previous presentation:** Poster presentation at Society of Teachers of Family Medicine Conference on Practice and Quality Improvement; September 11-13, 2023; St Louis, Missouri

**Funding support:** The Residency Program received a research teaching grant from the University of Minnesota as part of the Residency program.
